# Supplementary material
Source: publisher figshare collection journal article supplement (https://gsajournals.figshare.com/ndownloader/files/22364193)
Supplement: Supplementary file 1 [file 22364193]

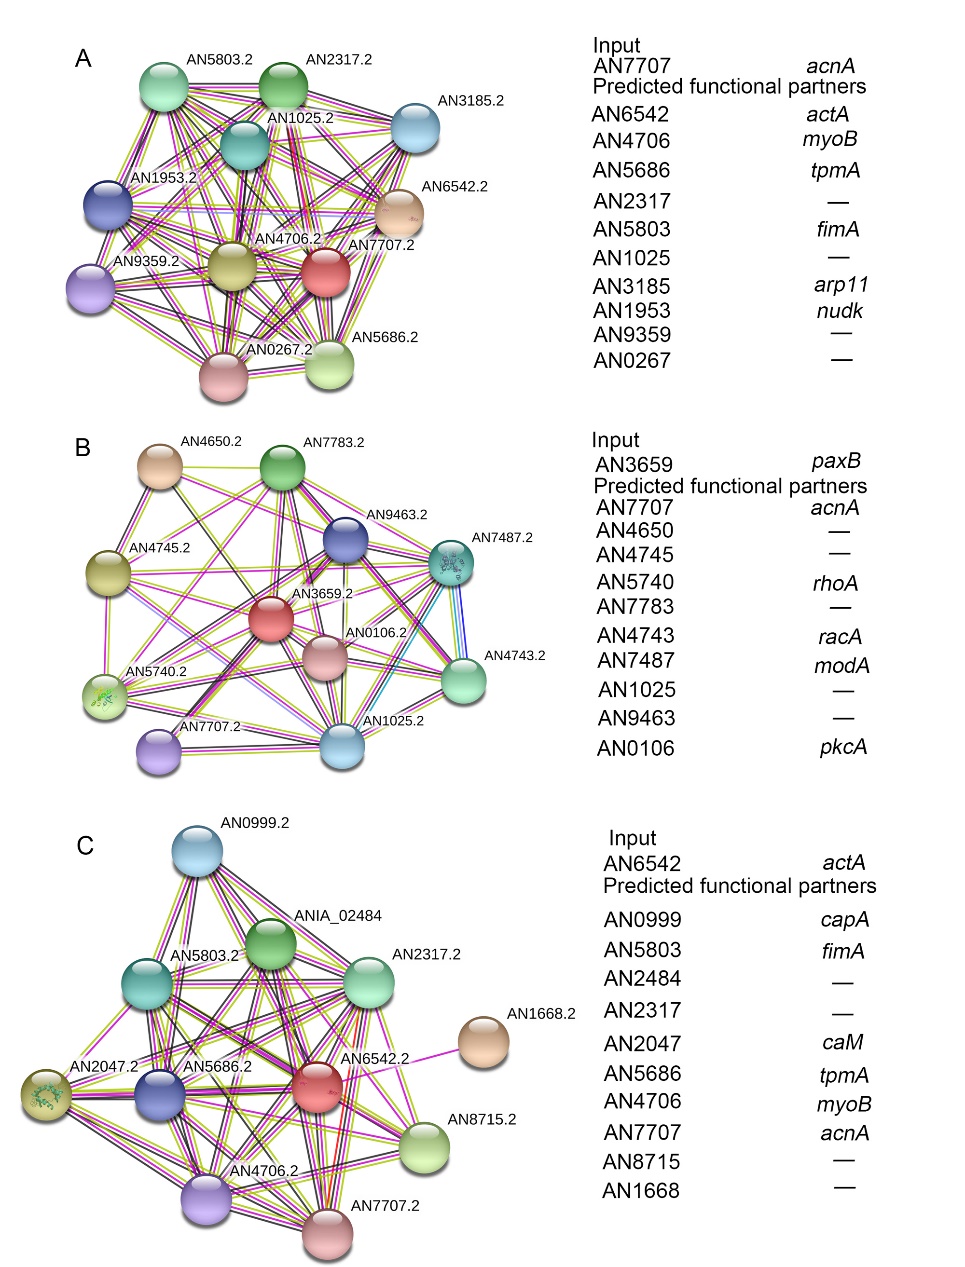


**Figure S7. Bioinformatic analysis of the potential interacting proteins of (A) α-actinin AcnA, (B) PaxB and (C) Actin ActA via a software-STRING.**
